# Supplementary material for: Induction of NANOG expression by targeting promoter sequence with small activating RNA antagonizes retinoic acid-induced differentiation
Source: PubMed Central journal article supplement — Biochem J. 2012 Apr 16;443(Pt 3):821–8. doi: 10.1042/BJ20111491 (PMC3327998; doi:10.1042/bj20111491), 2012-04-16
Supplement: bj4430821add.pdf [file bj4430821add.pdf]

SUPPLEMENTARY ONLINE DATA

Induction of *NANOG* expression by targeting promoter sequence with small activating RNA antagonizes retinoic acid-induced differentiation

Xiaoling WANG, Ji WANG, Vera HUANG, Robert F. PLACE and Long-Cheng LI<sup>1</sup>

Department of Urology, University of California San Francisco, San Francisco, CA 94158, U.S.A. and Helen Diller Family Comprehensive Cancer Center, University of California San Francisco, San Francisco, CA 94158, U.S.A.

**Table S1 Sequences of dsRNA and oligonucleotide primers**

The number in the dsRNA name denotes target location relative to the TSS.

(a)

| dsRNA name  | Sequence (5'→3')                                                              |
|-------------|-------------------------------------------------------------------------------|
| dsNanog-82  | Sense, GGUGAUJAGAGCCUUCAUUA[dT][dT]<br>Antisense, UAAUGAAGGCUCUAUCACC[dT][dT] |
| dsNanog-153 | Sense, AGACGGGAUUAACUGAGAA[dT][dT]<br>Antisense, UUCUCAGUUAAUCCCGUCU[dT][dT]  |
| dsNanog-194 | Sense, UGCAGCUACUUUUGCAUU[dT][dT]<br>Antisense, UAAUGCAAAGUAGCUGCA[dT][dT]    |
| dsNanog-205 | Sense, CUGGGUUAACUCUGCAGCUA[dT][dT]<br>Antisense, UAGCUGCAGAGUAACCCAG[dT][dT] |
| dsNanog-302 | Sense, CCUGAUUUAAAAGUUGGAA[dT][dT]<br>Antisense, UUCCAACUUUUAAAUCAGG[dT][dT]  |
| dsNanog-325 | Sense, UCCCAUUCUUGUUGAACCA[dT][dT]<br>Antisense, UGGUUCACAGGAAUGGGG[dT][dT]   |
| dsNanog-752 | Sense, GCCAGAUUUUGAGACUA[dT][dT]<br>Antisense, UAGCUGCAGAGUAACCCAG[dT][dT]    |
| dsNanog-926 | Sense, GGGAUJAGACAAGAAACCA[dT][dT]<br>Antisense, UUGGUUUUCUUGUCUAUCCC[dT][dT] |
| dsNanog-988 | Sense, CAGACCUUGGGAAGAAGCUA[dT][dT]<br>Antisense, UAGCUUCUCCCAGGUCUG[dT][dT]  |
| dsControl   | Sense, ACUACUGAGUGACAGUAGA[dT][dT]<br>Antisense, UCUACUGUCACUCAGUAGU[dT][dT]  |

(b)

| Primer name    | Sequence (5'→3')                                                           |
|----------------|----------------------------------------------------------------------------|
| <i>NANOG</i>   | Forward, AAAGAATCTTCACCTATGCC<br>Reverse, GAAGGAAGAGGAGAGACAGT             |
| <i>FOXH1</i>   | Forward, ACCTGCGACATGACAAGCC<br>Reverse, CTTCCAGCCCTCGTAGTCTT              |
| <i>REST</i>    | Forward, GCATAAAGATCTGTGTAGGCAGG<br>Reverse, TCCTACTTGAAAGGCGTGAGCA        |
| <i>OCT4</i>    | Forward, GACAGGGGGAGGGGAGGAGCTAGG<br>Reverse, CTTCCCTCCAACAGTTGCCCAAAC     |
| <i>REX1</i>    | Forward, AACGGGCAAGACAAGACAC<br>Reverse, GCTGACAGTTCTATTCCGC               |
| <i>ASCL1</i>   | Forward, CCTGGTGCGAATGGACTTTG<br>Reverse, CTCAGGTCCAGTTGCTCTTC             |
| <i>NEUROD1</i> | Forward, GAAGAGGAAGAGGAGATGACG<br>Reverse, TGGTGGTGGTGGGATAAG              |
| <i>PAX6</i>    | Forward, ACCATTATCCAGATGTGTTTGCCCGAG<br>Reverse, ATGGTGAAGCTGGGCATAGCGGCAG |
| <i>GAPDH</i>   | Forward, ATCACCATCTCCAGGAGCGA<br>Reverse, TTCTCCATGGTGGTGAAGACG            |

Received 15 August 2011/6 February 2012; accepted 17 February 2012  
Published as BJ Immediate Publication 17 February 2012, doi:10.1042/BJ20111491

<sup>1</sup> To whom correspondence should be addressed (email lilc@urology.ucsf.edu).
